# Supplementary material for: ACSL4-dependent ferroptosis does not represent a tumor-suppressive mechanism but ACSL4 rather promotes liver cancer progression
Source: PubMed Central journal article supplement (PMC9376109; doi:10.1038/s41419-022-05137-5), 2022-08-13

# Supplementary Figure 3

## Original Western Blots

### Fig. 3H

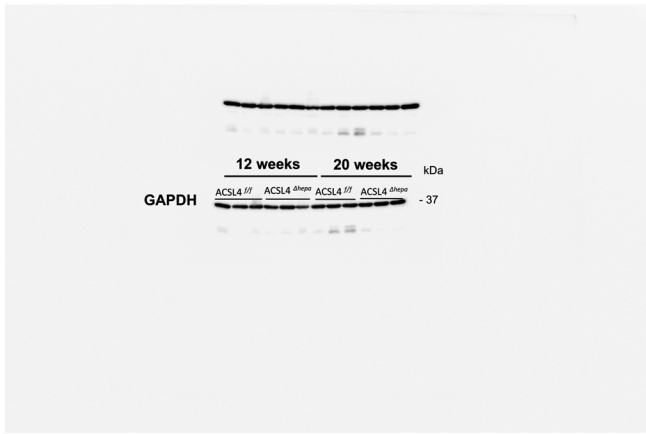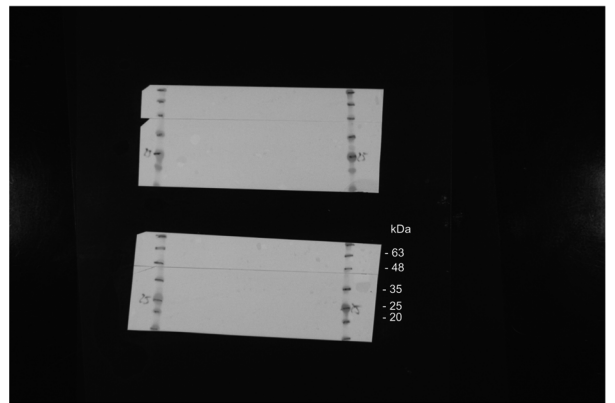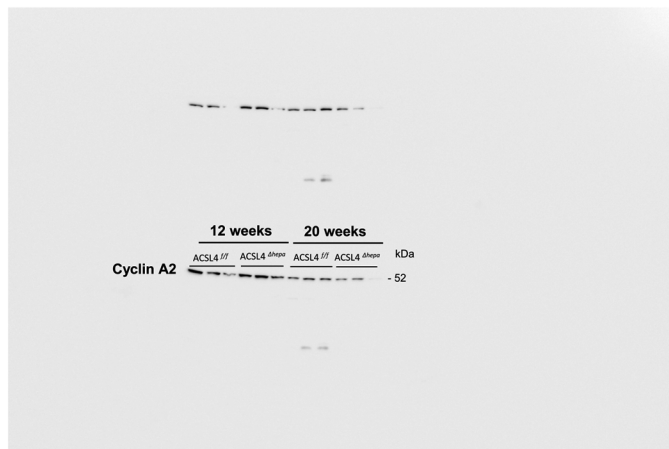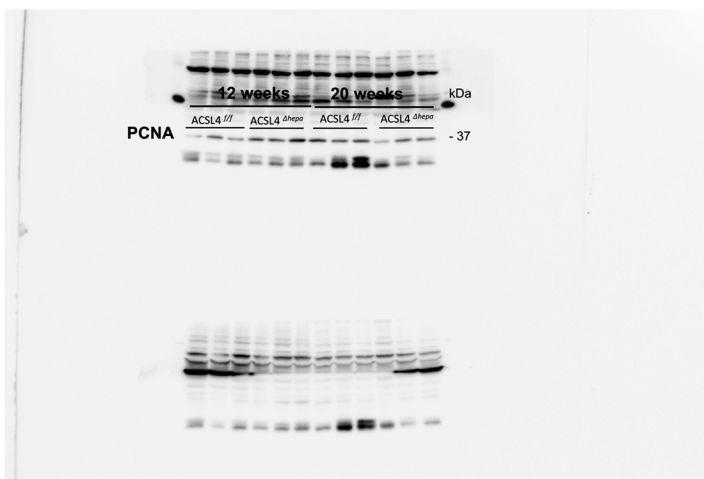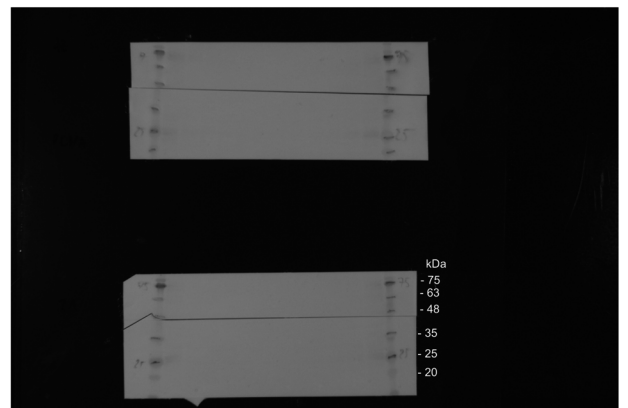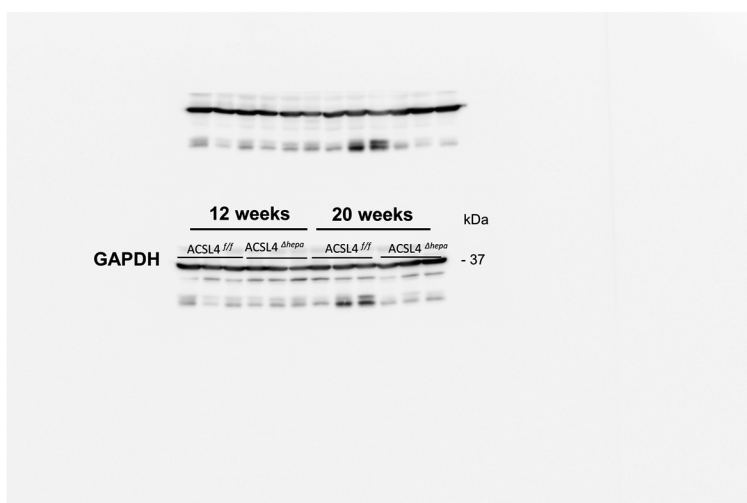

# Supplementary Figure 3

## Original Western Blots

### Suppl Fig. 1D

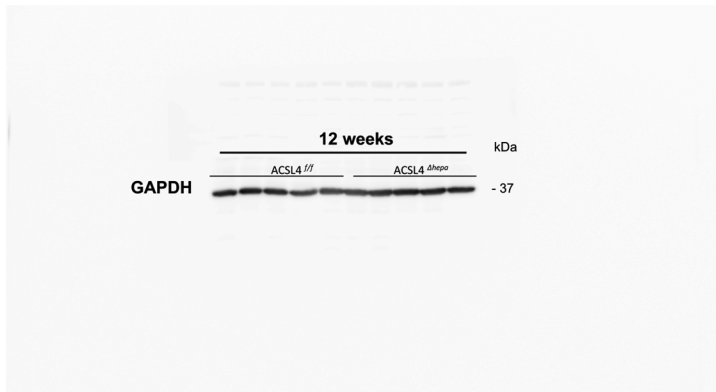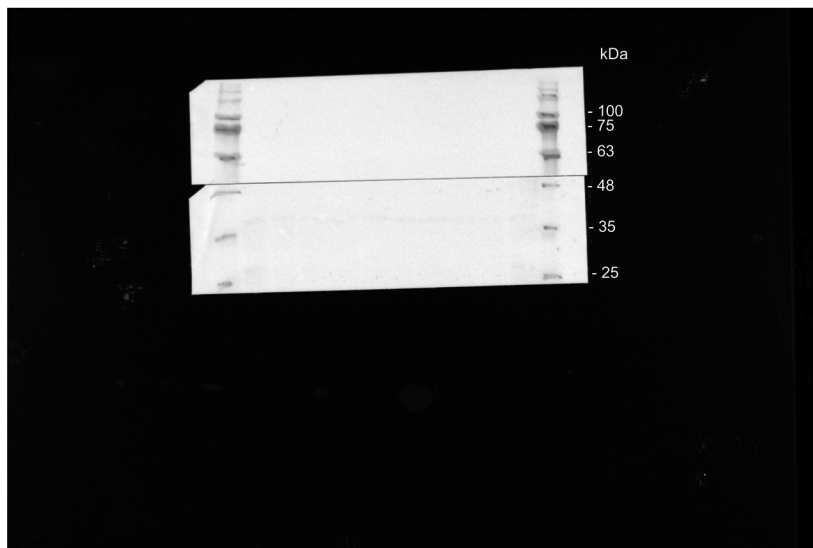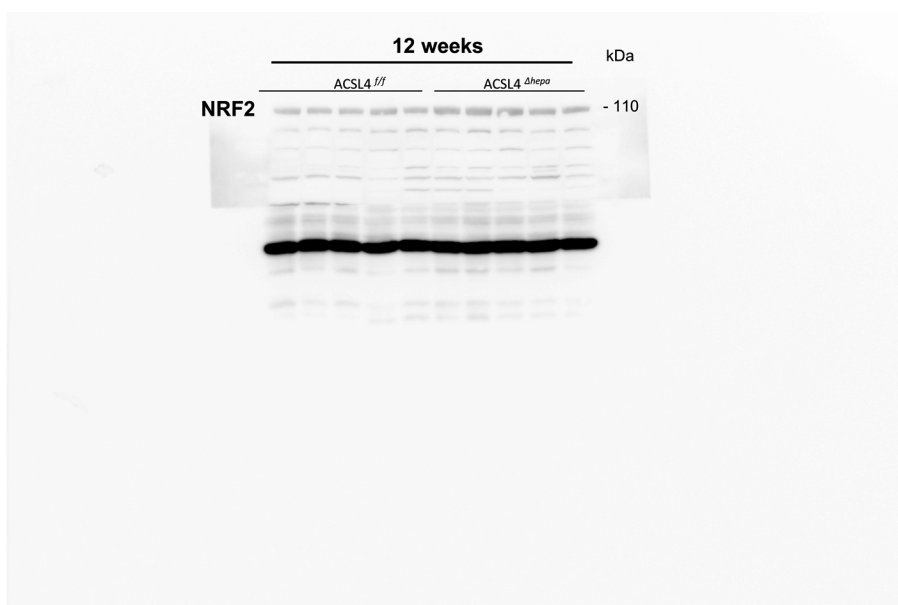

# Supplementary Figure 3

## Original Western Blots

### Suppl Fig. 2E

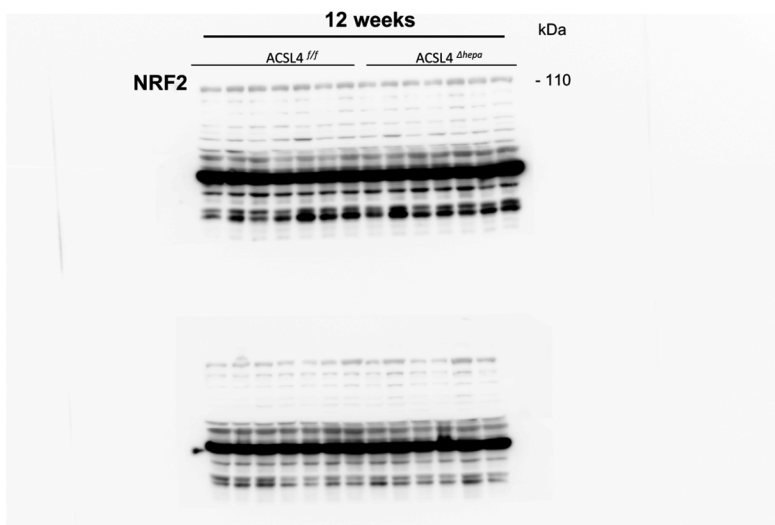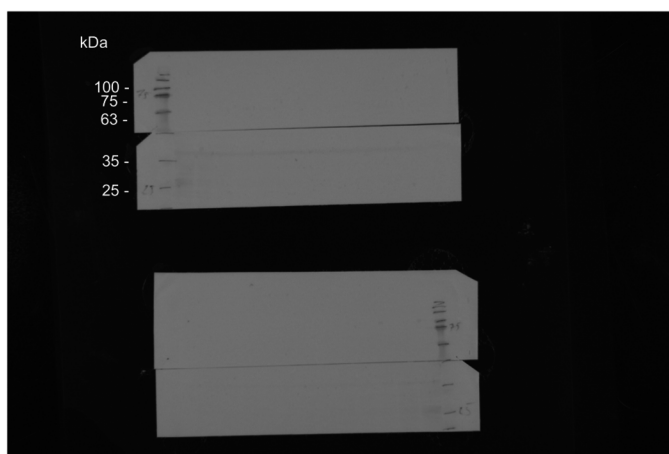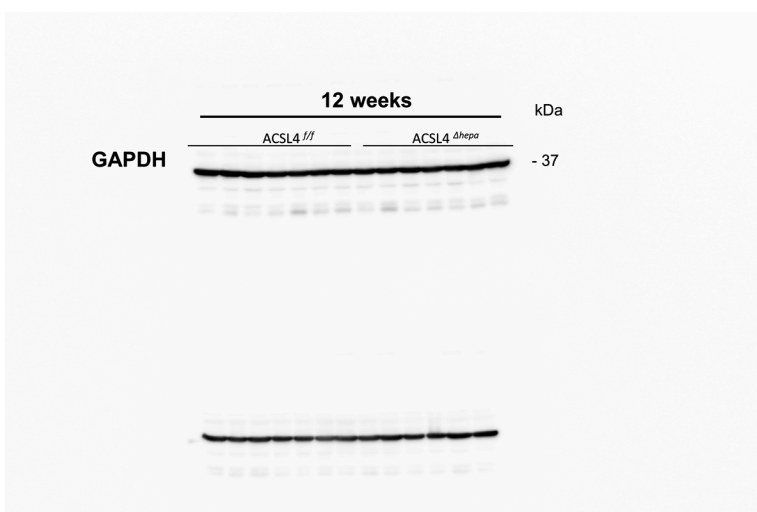

Supplement: 41419_2022_5137_MOESM4_ESM.pdf [file 41419_2022_5137_MOESM4_ESM.pdf]
